# Supplementary material
Source: Springer Nature journal article supplement (https://www.springermedizin.de/resource/supplementary/12889_2013_6410_MOESM2_ESM.pdf/9497856)

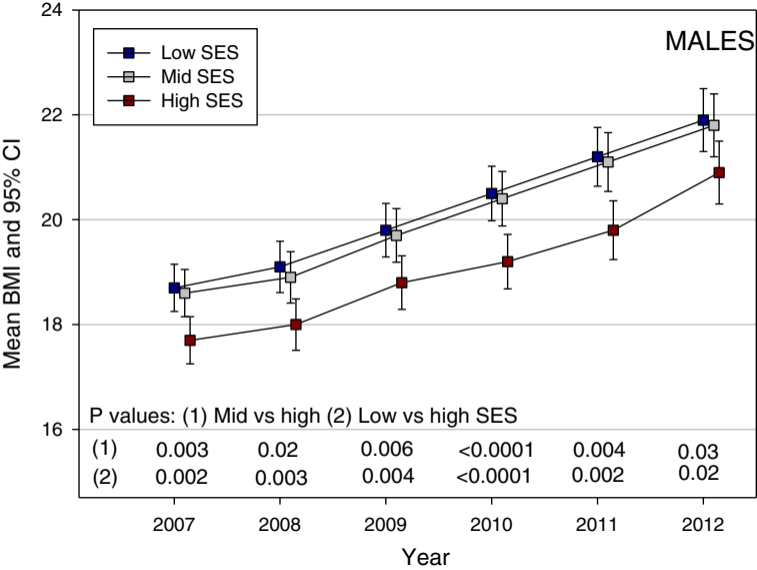

Supplement: MOESM2 [file 9497856]
